# Supplementary material
Source: Research Square preprint supplement (doi:10.21203/rs.3.rs-8869234/v1)
Supplement: Supplementary file 2 [file 249b9c9e4c67b4c73813ae22.docx]

### Supplementary Videos

**Supplementary Video 1. Forward locomotion generated by the CANN model.** Mechanical body simulation driven by body control angles derived from the CANN model under a forward-locomotion command. (Representative trajectory ID: 55–02; see the Zenodo repository [1])

**Supplementary Video 2. Backward locomotion generated by the CANN model.** Mechanical body simulation driven by body control angles derived from the CANN model under a backward-locomotion command.

**Supplementary Video 3. Switching between forward and backward locomotion commands.** Mechanical body simulation driven by CANN-derived muscle activity under commands alternating between forward and backward locomotion every 3.2 sec (total 10 sec)

**Supplementary Video 4.** **Locomotor bias induced by proprioceptive perturbations and SMD(D/V) ablation.** Simulated locomotion under *trp-1,2* perturbation and SMDD/SMDV neuronal ablation for the ten most promising optimized weight sets, showing dorsal bias upon SMDD ablation and ventral bias upon SMDV ablation, consistent with the reported phenotypes.
