# Supplementary material
Source: Research Square preprint supplement (doi:10.21203/rs.3.rs-8869234/v1)
Supplement: Supplementary file 3 [file ce934fedf6b7bb08ab74d369.docx]

### Supplementary Data Legend

**Supplementary** **Data 1.** **Cell list of the CANN model.** Names of the 267 *C. elegans* cells included in the CANN model. The cell identifiers follows the definition of the prior work [1].

**Supplementary** **Data 2.** **Synaptic Connection list of the CANN model.** List of synapses among the 267 cells, including presynaptic cell, postsynaptic cell, and the inferred synaptic polarity (excitatory/inhibitory)

**Supplementary** **Data 3. Parameter sets for the ten most promising optimized trajectories.** Optimized synaptic weight lists and initial membrane potentials for the ten trajectories selected based on reproducing phenotypes in the SMDD/SMDV ablation tests and the *trp-1,2* mutant test.

1. Cook, S. J. *et al.* Whole-animal connectomes of both Caenorhabditis elegans sexes. *Nature* **571**, 63–71 (2019).
