# Supplementary material
Source: Research Square preprint supplement (doi:10.21203/rs.3.rs-8869234/v1)
Supplement: Supplementary file 3 [file f9b49c17a5b8213d3fbafe79.docx]

## Supplementary Information

### S1. Time constant estimation of the membrane potential response

To derive a time constant of the membrane potential response to input current for each neuron, we curve-fitted the membrane potential values from previous work [1] for the time interval that spans from the initiation of input current application to the point at which the voltage has approached a steady state (1~1.1 sec) to an exponential function. The time constants were determined to be 0.021 seconds for RIM, 0.017 seconds for AIY, 0.007 seconds for AFD, and 0.018 seconds for AWA. Using interquartile-range-based outlier detection, we classified the time constants of three neurons (RIM, AIY, AWA) as non-outliers. The average time constant of these non-outlier neurons, approximately 0.019 seconds, was then adopted as the representative time constant () for all neurons and muscle cells in the CANN model (Fig. S1). The neuron time constants reported vary widely across studies: about 0.1 seconds[2], 0.002 seconds[3], 0.01 seconds[4], and between 0.5 to 2 seconds[5]. Some studies[2,4] have established equations for neuronal dynamics based on the capacitance of the phospholipid bilayer and the conductance of leak channels. However, the factors determining the neuronal dynamics of a neuron include not only leak channels but also voltage-gated ion channels whose resistance increases or decreases depending on the membrane potential[6]. Therefore, the use of a leaky-integrator equation for the relation between inflow current and membrane potential means the approximation of complex neuronal dynamics into a simpler dynamic where the opening rates of voltage-gated ion channels are fixed and operate like leak channels. Consequently, the methodology employed in prior research[2,4], which derives equations for neuronal dynamics exclusively based on membrane capacitance and leak channel conductance, could yield an imprecise time constant in accurately describing actual neuronal dynamics. On the other hand, when time constants derived directly from membrane potential measurements over time in current patch clamp experiments[1] are applied to a leaky-integrator equation, it allows for a more accurate modeling of the neuronal dynamics.

### S2. Formulating the leaky-integrator equation

The ordinary differential equation for the membrane potential is derived from the electrical circuit equations of the membrane potential as follows:

represents the cell membrane capacitance, and is the conductance of the leak channels. We approximate ion channels in the cell body as a single leak channel, assuming all cells have the same value. represents the current flow from the extracellular space into cell due to chemical synapses with cell . Not to sacrifice the simplicity of the model on ion-channel opening rate, we chose the logistic function[2] to describe the chemical synapse ion-channel opening rate dynamics, indicating that the presynaptic neuron's membrane potential immediately determines the synapse ion-channel opening rate. Assuming , we designed it so that the conductance of the synapse at minimum and maximum membrane potentials is 0.05 and 0.95 times the maximum conductance, respectively. represents the current flow from cell to cell through gap junctions, modeled as simple resistances. denotes the maximum conductance of ion channels at the chemical synapse from cell to cell , and denotes the conductance of the gap junction between cells and (note that ). Substituting and into , we get:

Dividing both sides by yields the compact form:

where , assuming all cells have the same (time constant of membrane potential response).

The weights and are defined as () and , (), respectively.

### S3. Definition of normalized membrane potential

In this study, for the sake of computational simplicity, we treated the membrane potentials of all *C. elegans* neurons in our neural network model in a normalized form. In real neurons, the resting membrane potential is determined by the composition of ion channels in the cell membrane and undergoes depolarization or hyperpolarization in response to a given stimulus. In our neural network model, the membrane potential of all neurons is confined to dimensionless values between 0 and 1, where 0 represents the resting membrane potential as a fully inactive state, and 1 represents the maximum depolarized membrane potential as a fully active state. This can be expressed mathematically as follows,

Here, the ​ represents the membrane potential of a given neuron (in millivolts). The  ​ denotes the resting membrane potential of the neuron, while ​ represents its maximum depolarized membrane potential. The   denotes the step function.

### S4. Modified semi-implicit Euler method

Let us solve the ordinary differential equation , where is a constant. The analytical solution is given by . However, the numerical solution, obtained through the implicit Euler method, is:

Comparing the analytical solution and reveals:

Thus, there is a discrepancy between the analytical solution and the numerical solution that increases as grows.

To address this, we introduce (if , then ) and modify the numerical solution to:

This adjustment maintains the form of the original numerical solution while allowing for more accuracy. This approach is used to accurately represent the decay rate of the membrane potential of a cell by substituting with in the numerical integration formula for the leaky integrator.

### S5. Definition of the error function

We defined the error function as follows,

where denotes the coefficient of each error term.

denotes the set of cell indices for body wall muscles. is the error dependent on the degree of muscle contraction (). decreases as approaches . is the target degree of muscle contraction based on the kymogram of *C. elegans* crawling obtained from a prior study[7]. Using the kymogram, a curve-fitting technique was applied in subsequent research[8] to determine the period and the linear wavenumber of *C. elegans*' locomotion to be 1.6 seconds and 1.832. Based on the period and the linear wavenumber, of 10 second time interval was calculated for a synaptic weight update process (See §S10).

and each represent errors designed to decrease as the correlation between anatomical synaptic weights and in-update-process synaptic weights increases. When and , we define the angular distances and as and , respectively. By preprocessing the anatomical connectome data, we obtained anatomical synaptic weights () for and . The number of synapses between two specific cells was quantified by analyzing electron microscopy images[9], building upon the images originally captured in prior research[10]. Although three-dimensional reconstructions of neuron contact surfaces are now available [11–13], those data cover only neurons near the nerve ring. Since our model requires a connectome that also includes the ventral nerve cord, we did not use those reconstructions. The definition of anatomical connectivity of a synapse, was defined as the count of EM images depicting chemical synapses from cell to cell [9]. This count reflects synapse size, as larger synapses may appear across multiple images. Similarly, is defined for the count of EM images depicting gap junctions between cell and cell . As three gap junctions in the anatomical connectome exhibited asymmetry[9], we symmetrized the counts by setting and . Additionally, we set the count for gap junctions that connect a cell to itself () to zero since our model inherently results in zero current for such connections. We considered the count of EM images () as a one-dimensional length of the synapse and as a two-dimensional cross-sectional area. We assumed that the synapse's conductance is proportional to its cross-sectional area (). For vectors and , along with and , where component indices follow the same order, we defined and to ensure the average component of and that of are both approximately 0.5.

In our model, limiting the magnitude of was necessary to prevent its unbounded growth during machine-learning iterations, which would otherwise lead to simulation failure. Therefore, we introduced  to the error function , designed to increase as and deviate from their predefined fixed points and , respectively, effectively preventing both and from growing infinitely large.

is a set of time points where forward-locomotion-command is given. Cell names enclosed within square brackets, presented in Roman type, serve as symbols for cell indices. The error term is minimized when the neck-bending angle (the fourth body angle) is in phase with SMDD membrane potential and antiphase with SMDV membrane potential.

### S6. Numerical integration of leaky-integrator equation

The equation of numerical integration[14,15] used in this paper is required not only for numerical integration but also for error optimization. Here, and represent the indices of neurons, and it is assumed that and are constants. The formula is as follows:

essentially represents the weighted mean of , , , and . This implies that is guaranteed to always be within the range defined by the minimum and maximum values among , , , and .

### S7. Derivatives of the error function

Differentiation of the numerical integration formula is required to minimize the error function for optimizing the weights of a leaky-integrator. Here is a breakdown of this process for a variable concerning :

To solve for , the following derivations are necessary, with being the indicator function of which value is 1 when the proposition is true or 0 when the proposition is false:

Note the symmetry of a gap junction ().

By substituting , , , , , and into the equation, we can derive and .

Similarly, by substituting , , , and into the equation, we can derive .

and this facilitates:

The derivative of can be aquired as:

The derivatives for and can be calculated as follows:

Applying those differential equations directly to the error optimization does not effectively reduce and . This is because and depend solely on the angular distances and , irrespective of the magnitudes of the vectors and . Therefore, alternative formulations were designed:

The derivatives for was calculated as follows:

The derivatives for can be calculated as follows:

Consequently, the differentiation of the total error is as follows:

### S8. Adaptive error minimization

To reduce the computational cost required for minimization of the error function, the following method was employed: For , the time range of used in the error function was divided into segments of length. In the initial optimization step, the error was calculated only for from to (). Each time when the error for each segment ( , , …) fell below a certain value (=(the number of all the cells)), the time interval was extended by (). And the last error segment was multiplied by a weighting factor of () to improve the minimization of the error segment, which is formulated as .

### S9. Method to calculate body control angle

In a similar sense to "Definition of target degree of muscle contraction" of Supplementary Information, body control angle (, middle panel of Fig. 3H) was calculated from degree of muscle contraction (, Fig. S6) as follows:

where factor 1.6 is a compensating multiplier for ElegansBot whose value is arbitrarily determined. is a linearly interpolated value of , adjusted to transition from 23 evenly spaced points to 24 evenly spaced points throughout the length of the *C. elegans*.

### S10. Definition of target degree of muscle contraction

To make CANN model machine-learn to produce degrees of muscle contraction required for forward and backward locomotion, proper target degrees of muscle contraction () should be defined. To do so, we first defined the target body control angle (, Fig. S5A):

for -th muscle cell of each left dorsal, right dorsal, right ventral muscle strand, (Fig. S5B) was defined as follows:

where is an integer number between 1 and 24 (e.g. is when ) and , , , and . There is one fewer muscle cell in subclass than in other muscle strand subclasses. So, was calculated by linearly interpolating under the assumption that the positions in which muscle cells of a muscle strand effect are evenly spaced throughout the entire length of *C. elegans*. During the synaptic weight update process, the membrane potentials of command neurons are set to be forward-locomotion-command or backward-locomotion-command corresponding to the target degrees of muscle contraction (i.e., forward-locomotion-command and backward-locomotion-command alternated every 3.2 seconds).

### Supplementary Information References

1. Liu, Q., Kidd, P. B., Dobosiewicz, M. & Bargmann, C. I. C. elegans AWA Olfactory Neurons Fire Calcium-Mediated All-or-None Action Potentials. *Cell* **175**, 57-70.e17 (2018).

2. Wicks, S. R., Roehrig, C. J. & Rankin, C. H. A Dynamic Network Simulation of the Nematode Tap Withdrawal Circuit: Predictions Concerning Synaptic Function Using Behavioral Criteria. *J. Neurosci.* **16**, 4017–4031 (1996).

3. Boyle, J. H., Berri, S. & Cohen, N. Gait Modulation in C. elegans: An Integrated Neuromechanical Model. *Front. Comput. Neurosci.* **6**, (2012).

4. Kunert, J., Shlizerman, E. & Kutz, J. N. Low-dimensional functionality of complex network dynamics: Neurosensory integration in the Caenorhabditis elegans connectome. *Phys. Rev. E* **89**, 052805 (2014).

5. Izquierdo, E. J. & Beer, R. D. From head to tail: a neuromechanical model of forward locomotion in Caenorhabditis elegans. *Philos. Trans. R. Soc. B Biol. Sci.* **373**, 20170374 (2018).

6. Hodgkin, A. L. & Huxley, A. F. A quantitative description of membrane current and its application to conduction and excitation in nerve. *J. Physiol.* **117**, 500–500 (1952).

7. Vidal-Gadea, A. *et al.* Caenorhabditis elegans selects distinct crawling and swimming gaits via dopamine and serotonin. *Proc. Natl. Acad. Sci.* **108**, 17504–17509 (2011).

8. Chung, T., Chang, I. & Kim, S. Development of equation of motion deciphering locomotion including omega turns of Caenorhabditis elegans. *eLife* **12**, RP92562 (2024).

9. Cook, S. J. *et al.* Whole-animal connectomes of both Caenorhabditis elegans sexes. *Nature* **571**, 63–71 (2019).

10. White, J. G., Southgate, E., Thomson, J. N. & Brenner, S. The Structure of the Nervous System of the Nematode Caenorhabditis elegans. *Philos. Trans. R. Soc. Lond. B. Biol. Sci.* **314**, 1–340 (1986).

11. Brittin, C. A., Cook, S. J., Hall, D. H., Emmons, S. W. & Cohen, N. *Volumetric Reconstruction of Main Caenorhabditis Elegans Neuropil at Two Different Time Points*. http://biorxiv.org/lookup/doi/10.1101/485771 (2018) doi:10.1101/485771.

12. Brittin, C. A., Cook, S. J., Hall, D. H., Emmons, S. W. & Cohen, N. A multi-scale brain map derived from whole-brain volumetric reconstructions. *Nature* **591**, 105–110 (2021).

13. Witvliet, D. *et al.* Connectomes across development reveal principles of brain maturation. *Nature* **596**, 257–261 (2021).

14. Lechner, M., Hasani, R. M. & Grosu, R. Neuronal Circuit Policies. *arXiv* http://arxiv.org/abs/1803.08554 (2018).

15. Lechner, M. *et al.* Neural circuit policies enabling auditable autonomy. *Nat. Mach. Intell.* **2**, 642–652 (2020).
